# Supplementary material for: Engineering a conserved RNA regulatory protein repurposes its biological function in vivo
Source: eLife. 2019 Jan 17;8:e43788. doi: 10.7554/eLife.43788 (PMC6351103; doi:10.7554/eLife.43788)
Supplement: Figure 3—source data 1. [file elife-43788-fig3-data1.xlsx]

## Sheet: Sheet1
Raw data for Beta-Glo assay of FBF-2 R5 SS/Y variant with different binding elements
Protein	RNA	Relative luminescence: replicate-1	Relative luminescence: replicate-2	Relative luminescence: replicate-3	Average relative luminescence	Standard deviation
FBF-2	NONE	37.7	37.5	52.9	42.7	8.8
FBF-2	PBE	164.8	191	118.3	158	36.8
FBF-2	FBE	45222.9	80005.7	107864	77697.6	31384.5
PUF-8	NONE	163	194.4	116.7	158	39.1
PUF-8	PBE	38417.2	38070.1	34902.4	37129.9	1936.8
PUF-8	FBE	99.7	119.3	99.3	106.1	11.5
FBF-2 variant R5 SS/Y	NONE	170.6	94.8	95.1	120.2	43.7
FBF-2 variant R5 SS/Y	PBE	41050.1	34418.7	29712.2	35060.3	5696.1
FBF-2 variant R5 SS/Y	FBE	25.5	40.9	34.8	33.7	7.7
