# Supplementary material for: Engineering a conserved RNA regulatory protein repurposes its biological function in vivo
Source: eLife. 2019 Jan 17;8:e43788. doi: 10.7554/eLife.43788 (PMC6351103; doi:10.7554/eLife.43788)
Supplement: Figure 4—source data 1. [file elife-43788-fig4-data1.xlsx]

## Sheet: Sheet1
Raw data for Beta-Glo assay FBF-2 R5 variants with different binding elements
Protein	RNA	Relative luminescence: replicate-1	Relative luminescence: replicate-2	Relative luminescence: replicate-3	Average relative luminescence	Standard deviation
FBF-2	NONE	37.7	37.5	52.9	42.7	8.8
FBF-2	PBE	164.8	191	118.3	158	36.8
FBF-2	FBE	45222.9	80005.7	107864	77697.6	31384.5
FBF-2 variant R5 SS/Y	NONE	170.6	94.8	95.1	120.2	43.7
FBF-2 variant R5 SS/Y	PBE	41050.1	34418.7	29712.2	35060.3	5696.1
FBF-2 variant R5 SS/Y	FBE	25.5	40.9	34.8	33.7	7.7
FBF-2 variant R5 AS/Y	NONE	97.5	42.5	110.6	83.5	36.2
FBF-2 variant R5 AS/Y	PBE	13934.1	19739.2	8151.7	13941.7	5793.8
FBF-2 variant R5 AS/Y	FBE	39.5	51.3	79	56.6	20.3
FBF-2 variant R5 SA/Y	NONE	84.1	87.9	87.4	86.5	2.1
FBF-2 variant R5 SA/Y	PBE	14705.3	11561.2	15229.5	13832	1984
FBF-2 variant R5 SA/Y	FBE	74.6	73	77.8	75.1	2.4
FBF-2 variant R5 AA/Y	NONE	61.5	65.1	62.3	63	1.9
FBF-2 variant R5 AA/Y	PBE	24294.9	23624.6	23706.5	23875.3	365.7
FBF-2 variant R5 AA/Y	FBE	160	156.5	162.6	159.7	3.1
FBF-2 variant R5 SS/A	NONE	181	194.4	122.4	166	38.3
FBF-2 variant R5 SS/A	PBE	311.1	253	196.2	253.4	57.5
FBF-2 variant R5 SS/A	FBE	54315.8	67423.7	84287.8	68675.8	15025.2
FBF-2 variant R5 SS/R	NONE	136.6	213	154.2	167.9	40
FBF-2 variant R5 SS/R	PBE	23540	14782.2	18196.1	18839.5	4414.2
FBF-2 variant R5 SS/R	FBE	29134.1	25527.8	55384.4	36682.1	16296.7
FBF-2 variant R5 CQ/Y	NONE	43.9	106.8	64.1	71.6	32.1
FBF-2 variant R5 CQ/Y	PBE	63.2	59.8	70.4	64.4	5.4
FBF-2 variant R5 CQ/Y	FBE	91.3	132.7	148.4	124.1	29.5
FBF-2 variant R5 AQ/Y	NONE	29.7	24.9	41	31.9	8.3
FBF-2 variant R5 AQ/Y	PBE	40390.9	41274.9	33655.9	38440.6	4167.1
FBF-2 variant R5 AQ/Y	FBE	366.6	512.1	363.7	414.1	84.9
