# Supplementary material for: Engineering a conserved RNA regulatory protein repurposes its biological function in vivo
Source: eLife. 2019 Jan 17;8:e43788. doi: 10.7554/eLife.43788 (PMC6351103; doi:10.7554/eLife.43788)
Supplement: Figure 4—source data 2. [file elife-43788-fig4-data2.xlsx]

## Sheet: Sheet1
Raw data for Beta-Glo assay of FBF-2, FBF-2 R5 variants and PUF-8 that carry R2 SE/H mutations with different length binding elements
Protein	RNA	Relative luminescence: replicate-1	Relative luminescence: replicate-2	Relative luminescence: replicate-3	Average relative luminescence	Standard deviation
PUF8 R2 SE/H	PBE	7	7.2	6	6.7	0.6
FBF R5 SS/Y R2 SE/H	PBE	28	33	25.8	28.9	3.7
FBF R5 AS/Y R2 SE/H	PBE	58.6	46.2	49.4	51.4	6.5
FBF R5 AQ/Y R2 SE/H	PBE	10.5	15.4	17.9	14.6	3.8
PUF8 R2 SE/H	7 BASE SITE (A6G)	36.9	38.3	37.9	37.7	0.7
FBF R5 SS/Y R2 SE/H	7 BASE SITE (A6G)	20	20.4	20.4	20.3	0.2
FBF R5 AS/Y R2 SE/H	7 BASE SITE (A6G)	46.9	54.6	40.4	47.3	7.1
FBF R5 AQ/Y R2 SE/H	7 BASE SITE (A6G)	37.8	30.9	37.2	35.3	3.8
PUF8 R2 SE/H	8 BASE SITE (A7G)	4246.7	4249.6	4098.4	4198.2	86.4
FBF R5 SS/Y R2 SE/H	8 BASE SITE (A7G)	1952.2	2246	1715.7	1971.3	265.7
FBF R5 AS/Y R2 SE/H	8 BASE SITE (A7G)	2603.9	2705.8	3586.5	2965.4	540.3
FBF R5 AQ/Y R2 SE/H	8 BASE SITE (A7G)	2209.9	2198.3	1750	2052.7	262.2
PUF8 R2 SE/H	9 BASE SITE (A8G)	31.4	35.9	42.5	36.6	5.6
FBF R5 SS/Y R2 SE/H	9 BASE SITE (A8G)	11.9	11.4	9.5	11	1.3
FBF R5 AS/Y R2 SE/H	9 BASE SITE (A8G)	5.1	5.5	6.1	5.6	0.5
FBF R5 AQ/Y R2 SE/H	9 BASE SITE (A8G)	7.5	8	12.8	9.5	2.9
PUF8 R2 SE/H	10 BASE SITE (A9G)	33.1	38.8	37.2	36.3	3
FBF R5 SS/Y R2 SE/H	10 BASE SITE (A9G)	19.5	19.9	19.4	19.6	0.3
FBF R5 AS/Y R2 SE/H	10 BASE SITE (A9G)	5.8	6.4	6.3	6.2	0.3
FBF R5 AQ/Y R2 SE/H	10 BASE SITE (A9G)	24.8	24.5	20.7	23.3	2.3
