# Supplementary material for: Engineering a conserved RNA regulatory protein repurposes its biological function in vivo
Source: eLife. 2019 Jan 17;8:e43788. doi: 10.7554/eLife.43788 (PMC6351103; doi:10.7554/eLife.43788)
Supplement: Figure 5—source data 1. [file elife-43788-fig5-data1.xlsx]

## Sheet: Sheet1
Raw data for Beta-Glo assay to test base recognition specificity by FBF-2 variants with mutant binding elements
Protein	RNA	Relative luminescence: replicate-1	Relative luminescence: replicate-2	Relative luminescence: replicate-3	Average relative luminescence	Standard deviation
PUF-8	PBE U3A	10.2	12.5	10.7	11.1	1.2
PUF-8	PBE U3G	10.3	8.7	11.3	10.1	1.3
PUF-8	PBE U3C	21.9	12.2	14.6	16.2	5
PUF-8	PBE	1580.2	1360.6	2763.4	1901.4	754.5
FBF-2 variant R5 SS/Y	PBE U3A	15.1	13.8	15.1	14.6	0.8
FBF-2 variant R5 SS/Y	PBE U3G	9.6	7.1	6.3	7.7	1.7
FBF-2 variant R5 SS/Y	PBE U3C	7.9	6	5.8	6.6	1.1
FBF-2 variant R5 SS/Y	PBE	976.9	924.1	809.6	903.6	85.6
FBF-2 variant R5 AS/Y	PBE U3A	13.9	17.8	17.7	16.5	2.2
FBF-2 variant R5 AS/Y	PBE U3G	10.8	13.2	12.2	12.1	1.2
FBF-2 variant R5 AS/Y	PBE U3C	32.1	33.9	25	30.3	4.7
FBF-2 variant R5 AS/Y	PBE	2471	1462.5	1943.8	1959.1	504.4
FBF-2 variant R5 AQ/Y	PBE U3A	77.7	67.5	89.2	78.2	10.8
FBF-2 variant R5 AQ/Y	PBE U3G	34.4	28.4	21.7	28.2	6.4
FBF-2 variant R5 AQ/Y	PBE U3C	67.8	77.5	82.4	75.9	7.4
FBF-2 variant R5 AQ/Y	PBE	1040.8	1220	879.4	1046.7	170.4
PUF-8	PBE	1154.4	1845.2	2101.5	1700.4	489.9
PUF-8	PBE A4G	19.9	21.2	16.3	19.1	2.5
PUF-8	PBE A4C	35.4	28	40.8	34.7	6.4
PUF-8	PBE A4U	10.7	18.7	19.5	16.3	4.9
FBF-2 variant R5 SS/Y	PBE	707.1	941.6	767.6	805.4	121.7
FBF-2 variant R5 SS/Y	PBE A4G	1338.4	2352.7	1364.9	1685.3	578.1
FBF-2 variant R5 SS/Y	PBE A4C	16.8	19.3	15.2	17.1	2.1
FBF-2 variant R5 SS/Y	PBE A4U	42	45.2	39.6	42.3	2.8
FBF-2 variant R5 AS/Y	PBE	3506.3	2823.5	2560.4	2963.4	488.2
FBF-2 variant R5 AS/Y	PBE A4G	393.9	306.8	317.1	339.3	47.6
FBF-2 variant R5 AS/Y	PBE A4C	43.7	21.9	23.5	29.7	12.1
FBF-2 variant R5 AS/Y	PBE A4U	3310.9	2178.9	2644.5	2711.4	569
FBF-2 variant R5 AQ/Y	PBE	1040.8	1220	879.4	1046.7	170.4
FBF-2 variant R5 AQ/Y	PBE A4G	226.1	214.6	190.9	210.5	17.9
FBF-2 variant R5 AQ/Y	PBE A4C	77.7	65.2	75.9	72.9	6.7
FBF-2 variant R5 AQ/Y	PBE A4U	74.9	60.5	76.1	70.5	8.7
PUF-8	PBE	1154.4	1845.2	2101.5	1700.4	489.9
PUF-8	PBE A5G	12.3	25.2	22.5	20	6.8
PUF-8	PBE A5C	170.4	209.5	113.2	164.4	48.5
PUF-8	PBE A5U	232.6	159.3	132.8	174.9	51.7
FBF-2 variant R5 SS/Y	PBE	683	834.9	582.9	700.3	126.9
FBF-2 variant R5 SS/Y	PBE A5G	5.9	5.9	5.8	5.9	0.1
FBF-2 variant R5 SS/Y	PBE A5C	7.3	8.1	8.1	7.8	0.5
FBF-2 variant R5 SS/Y	PBE A5U	25	16.9	20.2	20.7	4.1
FBF-2 variant R5 AS/Y	PBE	3506.3	2823.5	2560.4	2963.4	488.2
FBF-2 variant R5 AS/Y	PBE A5G	18.5	15.8	15.5	16.6	1.6
FBF-2 variant R5 AS/Y	PBE A5C	12.9	11	11	11.6	1.1
FBF-2 variant R5 AS/Y	PBE A5U	308.2	434.4	301.8	348.1	74.8
FBF-2 variant R5 AQ/Y	PBE	1040.8	1220	879.4	1046.7	170.4
FBF-2 variant R5 AQ/Y	PBE A5G	71.2	52.4	60.8	61.5	9.4
FBF-2 variant R5 AQ/Y	PBE A5C	99.6	81.3	146.3	109.1	33.6
FBF-2 variant R5 AQ/Y	PBE A5U	655.9	722.2	626.9	668.3	48.8
