# Supplementary material for: Engineering a conserved RNA regulatory protein repurposes its biological function in vivo
Source: eLife. 2019 Jan 17;8:e43788. doi: 10.7554/eLife.43788 (PMC6351103; doi:10.7554/eLife.43788)
Supplement: Table 2—source data 1. [file elife-43788-table2-data1.xlsx]

## Sheet: Sheet1
Protein	RNA	Kd (nM)	Replicate 1	Replicate 2	Replicate 3
PUF-8	PBE	28.8 ± 0.7	27.874 ± 6.66	30.124 ± 8.83	28.319 ± 5.59
	PBE-A5	25.9 ± 3.1	20.529 ± 5.13	31.235 ± 8.94	26.036 ± 6.73
	PBE-C5	44.8 ± 2.4	40.285 ± 7.36	45.619 ± 7.85	48.579 ± 8.59
	PBE-G5	45.6 ± 3.1	49.181 ± 10.9	48.276 ± 10.2	39.412 ± 10.3
	FBE	3110 ± 656	3847.9 ± 728	1799.6 ± 246	3673.8 ± 484
FBF-2 WT	PBE	74.6 ± 7.7	60.705 ± 1.14	76.009 ± 1.842	87.102 ± 2.712
	FBE	19.3 ± 0.6	20.402 ± 0.61	18.592 ± 0.850	18.963 ± 1.001
FBF-2 SS/Y	PBE	22.7 ± 0.4	23.039 ± 4.959	22.043 ± 1.409	23.152 ± 2.26
	FBE	50.9 ± 2.3	49.068 ± 5.087	48.175 ± 2.722	55.601 ± 6.629
FBF-2 AS/Y	PBE	16.3 ± 0.8	16.941 ± 0.7419	17.126 ± 1.177	14.739 ± 0.8096
	FBE	76.7 ± 4.3	73.408 ± 2.653	71.552 ± 4.121	85.184 ± 6.438
FBF-2 SS/R	PBE	51.1 ± 1.1	53.033 ± 2.61	49.342 ± 1.755	50.874 ± 1.659
	FBE	26.9 ± 2.3	31.409 ± 1.448	25.406 ± 2.101	23.826 ± 1.008
FBF-2 AQ/Y	PBE	20.2 ± 1.2	18.014 ± 1.811	20.274 ± 0.8517	22.218 ± 1.32
	FBE	79.9 ± 2.0	83.268 ± 9.337	76.48 ± 5.988	80.044 ± 4.526
